# Supplementary material
Source: PubMed Central journal article supplement (PMC1334653)
Supplement: pnas_0507661103_1.pdf [file pnas_0507661103_1.pdf]

## Supporting Text

### Methods

#### *Analysis of binding data*

Equilibrium-binding data were used to calculate apparent binding constants for association of peptide fragments to spectrin in the intact ghost. Writing  $\bar{A}$  and  $\bar{B}$  for the total concentrations of the  $\alpha$ -peptide and membrane-associated spectrin (in terms of dimers),  $c$  for that of the  $\alpha\beta$  complexes, and  $K_a$  for the association constant:

$$c^2 - c \left( \bar{A} + \bar{B} + \frac{1}{K_a} \right) + \bar{A}\bar{B} = 0$$

This equation was used to extract the least-squares best fit for the association constant.

The rate of formation of the complex,  $c$ , of the  $\alpha$ - and  $\beta$ -peptides is given by

$$\frac{dc}{dt} = k_+ (\bar{A} - c)(\bar{B} - c) - \frac{k_+ c}{K_a}$$

where  $k_+$  is the forward second-order rate constant,  $K_a$  the association constant,  $c$  the concentration of  $\alpha\beta$  complex at time  $t$ , and  $\bar{A}$  and  $\bar{B}$  the total concentrations of the two peptides. If, as here, the association constant is so low that the peptide is in large excess over endogenous spectrin,  $A \gg c$ , and the kinetics reduced to a pseudofirst-order process, integration, keeping in mind that  $c = 0$  when  $t = 0$ , then yields:

$$k_+ t = \frac{\bar{A}K_a}{\bar{A}K_a + 1} \ln \frac{\bar{A}K_a\bar{B}}{\bar{A}K_a\bar{B} - c(\bar{A}K_a + 1)}$$

The second- and pseudofirst-order rate constants,  $k_+'$  and  $k_+$  are then related by  $k_+' = k_+/\bar{A}$ .

In experiments to measure dissociation rates, the inverse integrated rate equations were used to fit the data. Thus, if  $c$  is the concentration of the  $\alpha\beta$  complex on beads bearing coupled  $\beta$ -chain fragments, initially (at  $t = 0$ )  $c_0$ , whereas  $A$  and  $B$  are the concentrations of free  $\alpha$ - and  $\beta$ -chain fragments, with an initial concentration of unoccupied  $\beta$ -chains of  $B_0$ ,

$$-\frac{dc}{dt} = k_-c - k_-K_aAB$$

where  $k_-$  is the first-order dissociation rate constant. Integration then yields:

$$k_-t = Q^{-\frac{1}{2}} \ln \left( \frac{2K_aA + 1 + K_aB + Q^{\frac{1}{2}}}{2K_aA + 1 + K_aB - Q^{\frac{1}{2}}} \cdot \frac{1 + K_aB - Q^{\frac{1}{2}}}{1 + K_aB + Q^{\frac{1}{2}}} \right)$$

where  $Q = 4K_ac_0 + (1 + K_aB_0)^2$
